# Supplementary material for: Three-Dimensional Numerical Analysis on the Influence of Buttress Wall Removal Timing on the Lateral Deformation of Diaphragm Walls during Deep Excavation
Source: MDPI journal article supplement (doi:10.3390/buildings13112678), 2023-10-24
Supplement: s1 [file s1]

## Supplementary Materials:

**Table S1:** Simplified Soil Layer Parameter Table.

| Layer | Soil Layer Description | Layer Bottom Distribution Depth (GL.-m) | Average Distribution Elevation (GL.-m) | N Value    | $\gamma_t$ (t/m <sup>3</sup> ) | $W_n$ (%) | $W_L$ (%) | $S_u^*$ (t/m <sup>2</sup> ) | $C'$ (t/m <sup>2</sup> ) | $\varphi'^*$ (deg.) | $C_c^*$ | $C_r^*$ | $E^*$ (t/m <sup>2</sup> ) |
|-------|------------------------|-----------------------------------------|----------------------------------------|------------|--------------------------------|-----------|-----------|-----------------------------|--------------------------|---------------------|---------|---------|---------------------------|
| 1     | Backfill Layer (SF)    | 0.1~0.9 (0.5)                           | 0.0~0.5                                | -          | 1.95*                          | --        | --        | --                          | 0                        | 29                  | --      | --      | --                        |
| 2     | Silty Clay Layer (CL)  | 1.8~3.7 (3.0)                           | 0.5~3.0                                | 2~7 (4)    | 1.95*                          | 26.3      | 35.5      | 3.0                         | 0                        | 30                  | 0.27    | 0.03    | 1200                      |
| 3     | Silty Sand Layer (SM)  | 9.2~10.6 (9.9)                          | 3.0~9.9                                | 2~13 (6)   | 2.02                           | 20.2      | --        | --                          | 0                        | 30                  | --      | --      | 1500                      |
| 4     | Silty Clay Layer (CL)  | 19.8~27.4 (23.1)                        | 9.9~23.1                               | 2~6 (3)    | 1.90                           | 30.9      | 32.3      | 3.0~6.0                     | 0                        | 29                  | 0.31    | 0.031   | 1500~3000                 |
|       |                        | 40.0~41.5 (40.7)                        | 23.1~40.7                              | 4~14 (7)   | 1.92                           | 29.8      | 32.1      | 6.0~10.0                    | 0                        | 30                  | 0.30    | 0.030   | 3000~5000                 |
| 5     | Silty Sand Layer (SM)  | 40.9~45.0 (42.2)                        | 40.7~42.2                              | 11~24 (16) | 1.94                           | 24.7      | --        | --                          | 0                        | 31                  | --      | --      | 4000                      |
| 6     | Silty Clay Layer (CL)  | 51.9~54.3 (52.7)                        | 42.2~54.7                              | 9~35 (19)  | 1.95                           | 27.3      | 32.7      | 10.0~14.0                   | 0                        | 31                  | 0.29    | 0.029   | 5000~7000                 |
| 7     | Gravel Layer (GW/GP)   | -- (Drilling Depth)                     | >52.7                                  | >50        | 2.2*                           | --        | --        | --                          | 0                        | 40                  | --      | --      | >12500                    |

Note: 1. Values within the parentheses are averages or representative values. 2. Items marked with an asterisk (\*) indicate estimated values based on experience.

3. The onsite measurement of the groundwater level is approximately between GL.-2.8m and GL.-3.6m below the ground surface. It is recommended that the constant groundwater level for temporary structural design be at GL.-2.8m, and the long-term groundwater level for permanent structural design be at the ground surface level.

**Table S2.** Material parameters for the Pile Wall (Embedded Beam)

| Name                                               | Unit              | Parameter Value | Remarks              |
|----------------------------------------------------|-------------------|-----------------|----------------------|
| Young's Modulus $E$ ( $f_c' = 280\text{kg/cm}^2$ ) | kN/m <sup>2</sup> | 1.48e7          | Reduction factor 0.6 |
| Unit Weight $\gamma$                               | kN/m <sup>3</sup> | 10              |                      |
| Predefined beam type                               |                   |                 | Massive square beam  |
| Width                                              | m                 | 2.1             |                      |
| Skin Friction at Pile Head $T_{skin,start,max}$    | kN/m              | 250             |                      |
| Skin Friction at Pile Base $T_{skin,end,max}$      | kN/m              | 550             |                      |
| Maximum Pile Bearing Capacity $F_{max}$            | kN                | 12,000          |                      |

Note 1. Pile dimensions are 1.2 m x 3.5 m.

Note 2. Average pile shaft friction is calculated as 12,000 kN/30 = 400 kN/m.

**Table S3.** Material parameters for the Top-Down Steel Column (Beam)

| Name                                               | Unit              | Parameter Value | Remarks                                                       |
|----------------------------------------------------|-------------------|-----------------|---------------------------------------------------------------|
| Material properties                                |                   | Elastic         |                                                               |
| Young's Modulus $E$ ( $f_c' = 560\text{kg/cm}^2$ ) | kN/m <sup>2</sup> | 3.48e7          | $E_c = 150,000 \times \sqrt{f_c'} \times 9.8(\text{kN/cm}^2)$ |
| Unit Weight $\gamma$                               | kN/m <sup>3</sup> | 25              |                                                               |
| Predefined beam type                               |                   |                 | Massive rectangle beam                                        |
| Height                                             | m                 | 1.2             |                                                               |
| Width                                              | m                 | 1.2             |                                                               |
| Moment of inertia $I$                              | m <sup>4</sup>    | 0.1728          | $I_2 = I_3$                                                   |

**Table S4.** Node-to-Node Anchor Material Parameters

| Parameter         | Symbol                   | Node-to-Node<br>Anchor | Unit                           | Notes                          |
|-------------------|--------------------------|------------------------|--------------------------------|--------------------------------|
| Material Type     | Type                     | Elastic                | --                             | $\emptyset=0.7$                |
| Axial Stiffness   | $\emptyset EA$           | 8517144                | KN                             | $E=205947000$ ;<br>$A=0.05908$ |
| Steel Profile     | Minimum Preload<br>(ton) | Site Preload (ton)     | Allowable Axial Force<br>(ton) |                                |
| 2H414×405×18×28mm | 100 (per unit)           | 100 (per unit)         | 234.86 (per unit)              |                                |

Note: Horizontal spacing of the bracing is 6m.

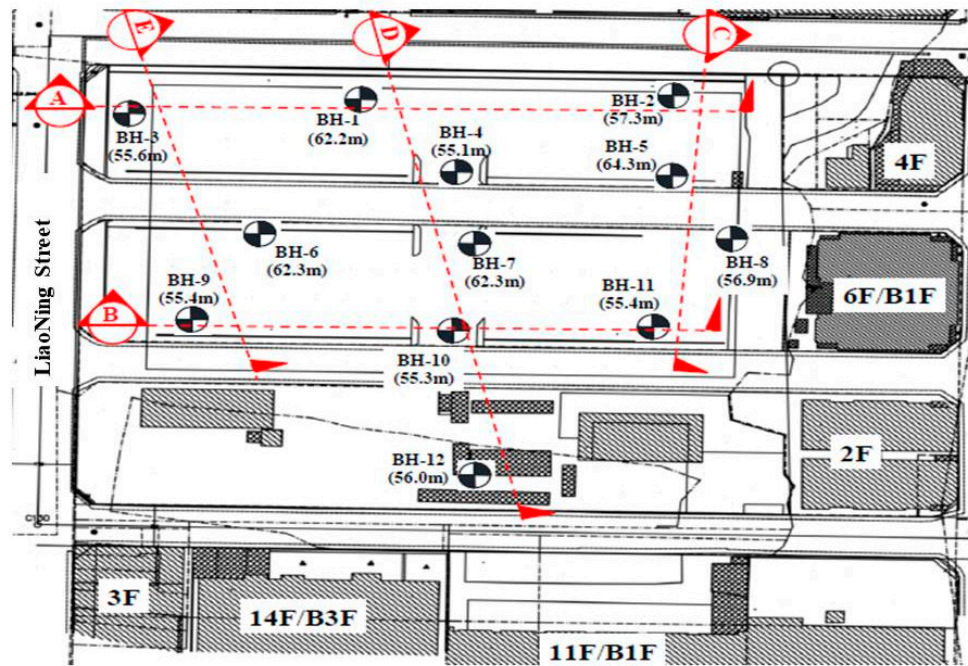

**Figure S1.** Borehole Plan Layout and Cross-Section Line.

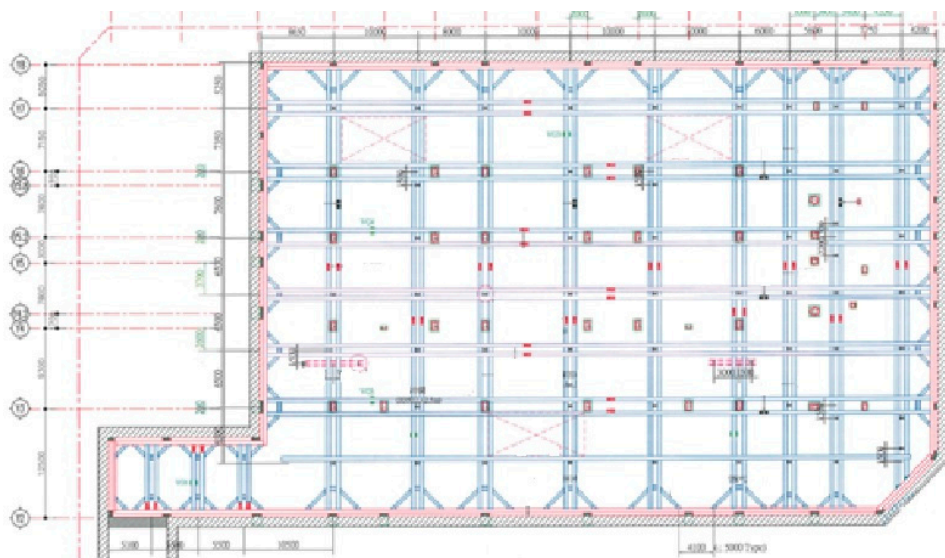

**Figure S2.** Ground Level Horizontal Bracing Layout

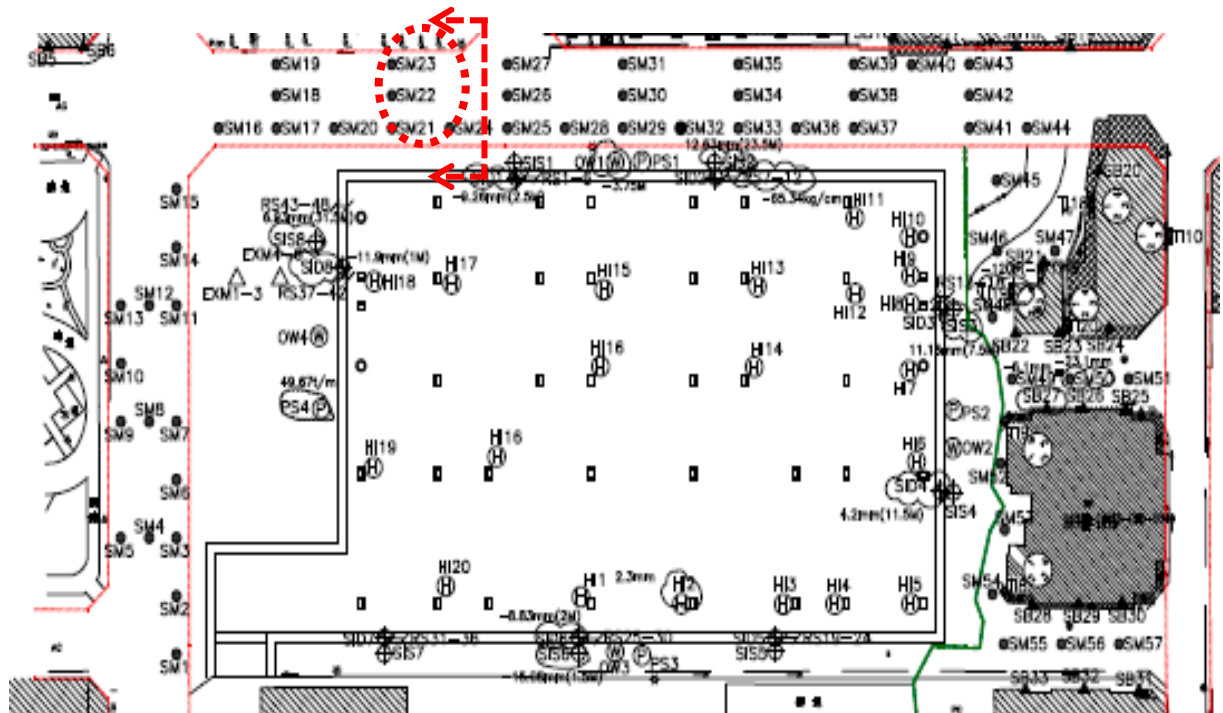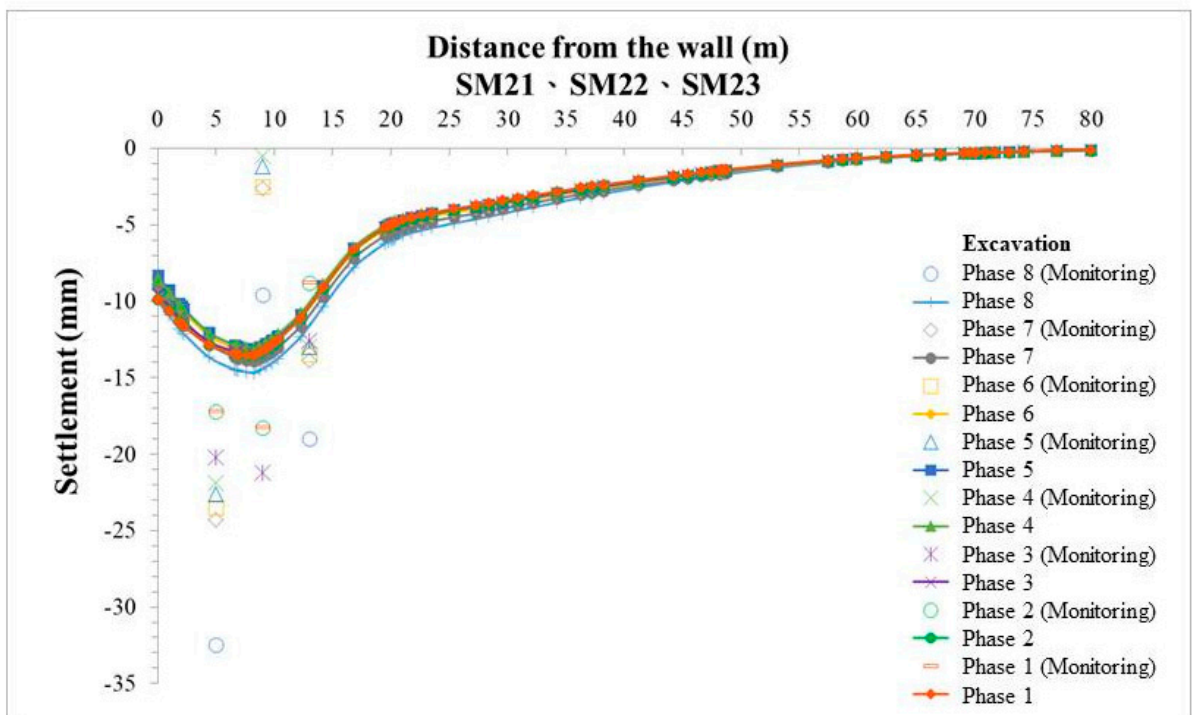

**Figure S3.** Comparison of Ground Subsidence Analysis and Monitoring Results for Each Excavation Phase on the Northeast Side

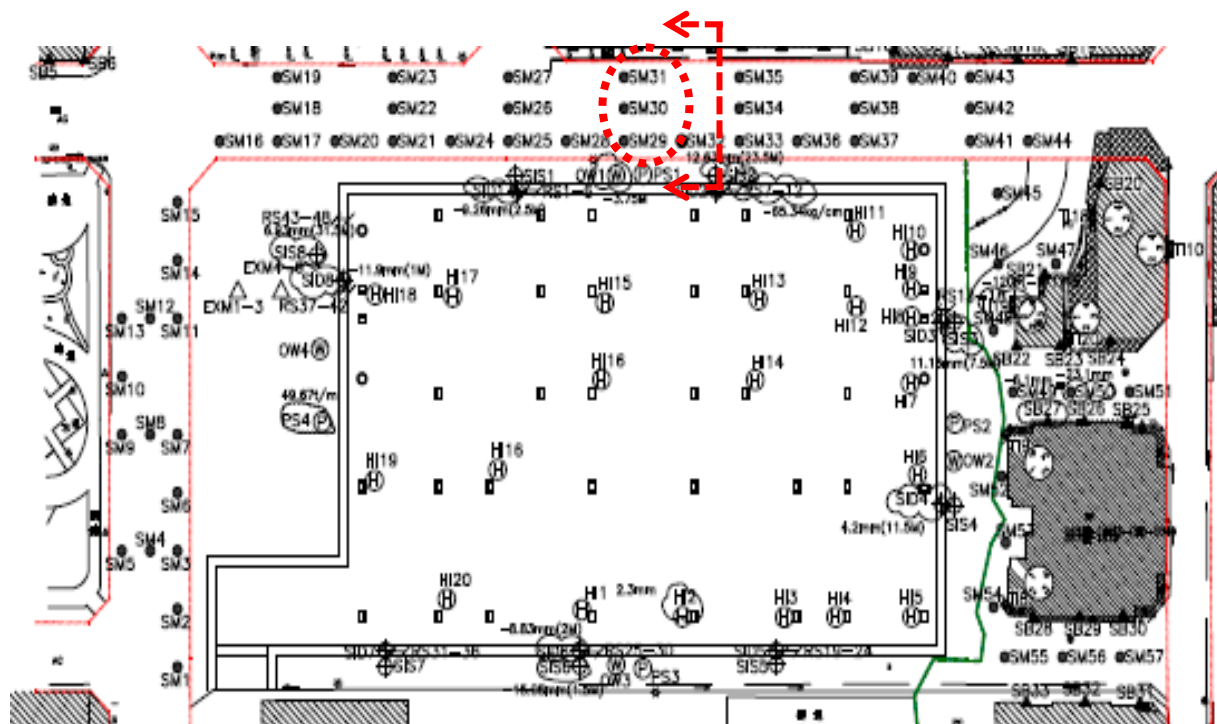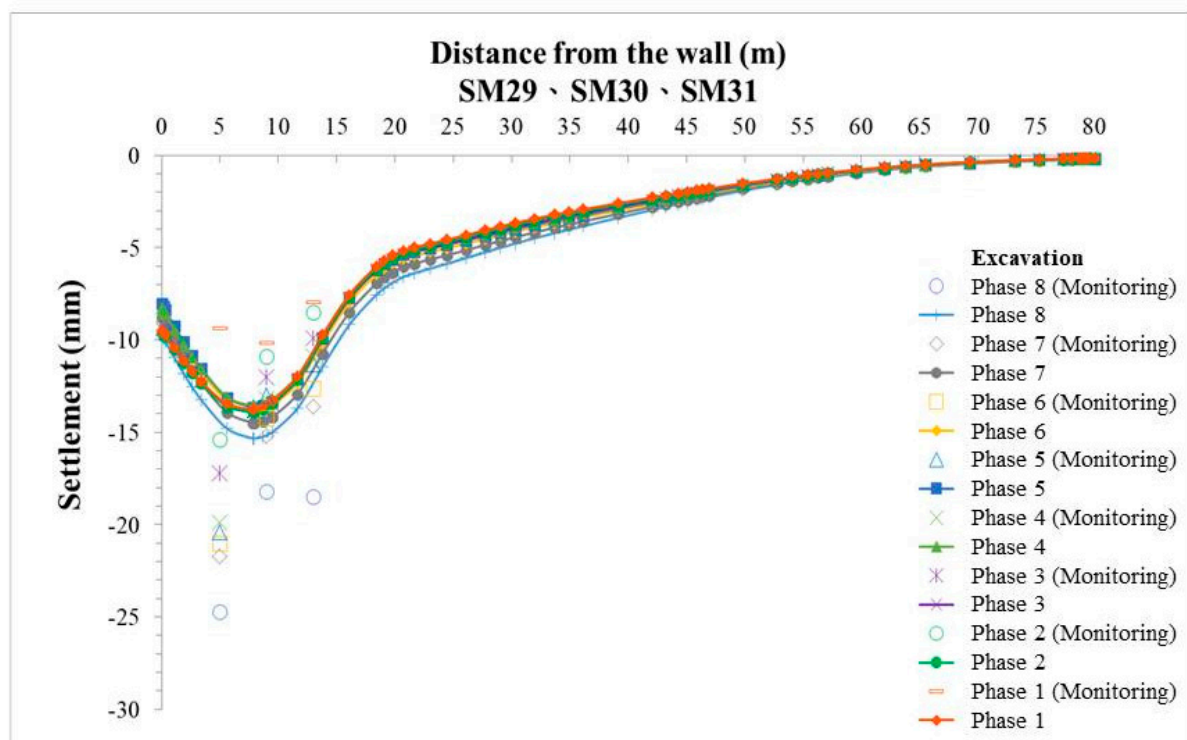

**Figure S4** Comparison of Ground Subsidence Analysis and Monitoring Results for Each Excavation Phase on the North Side

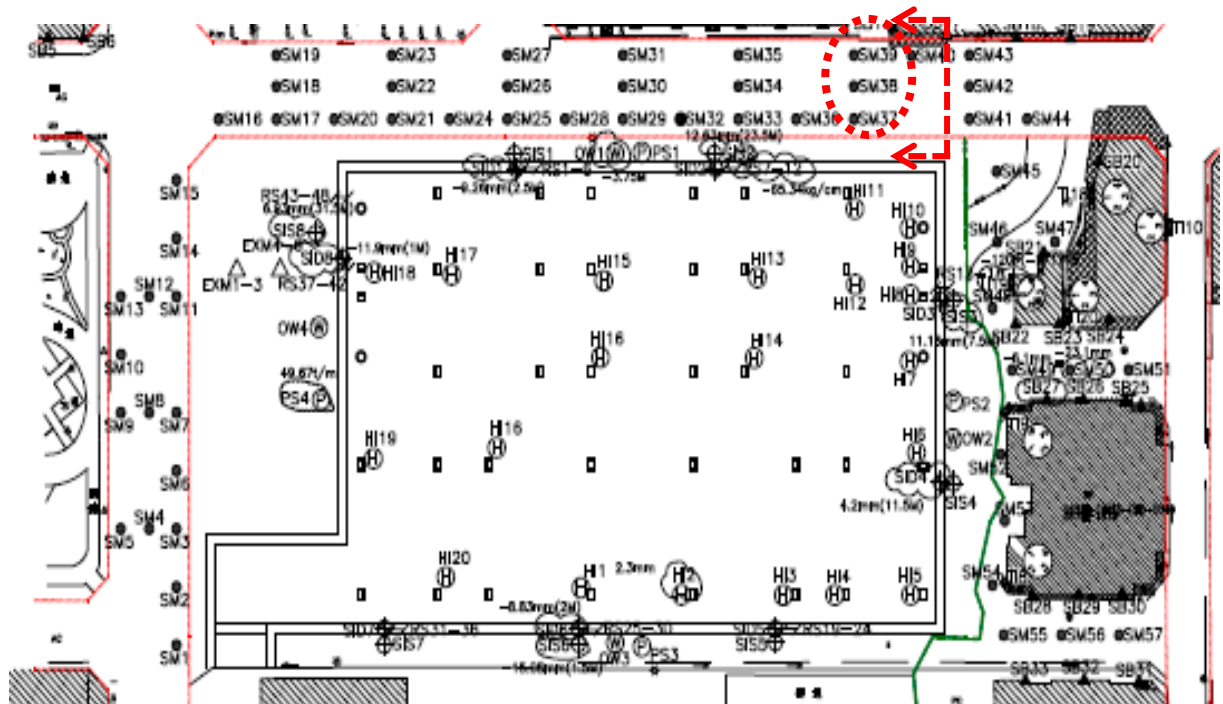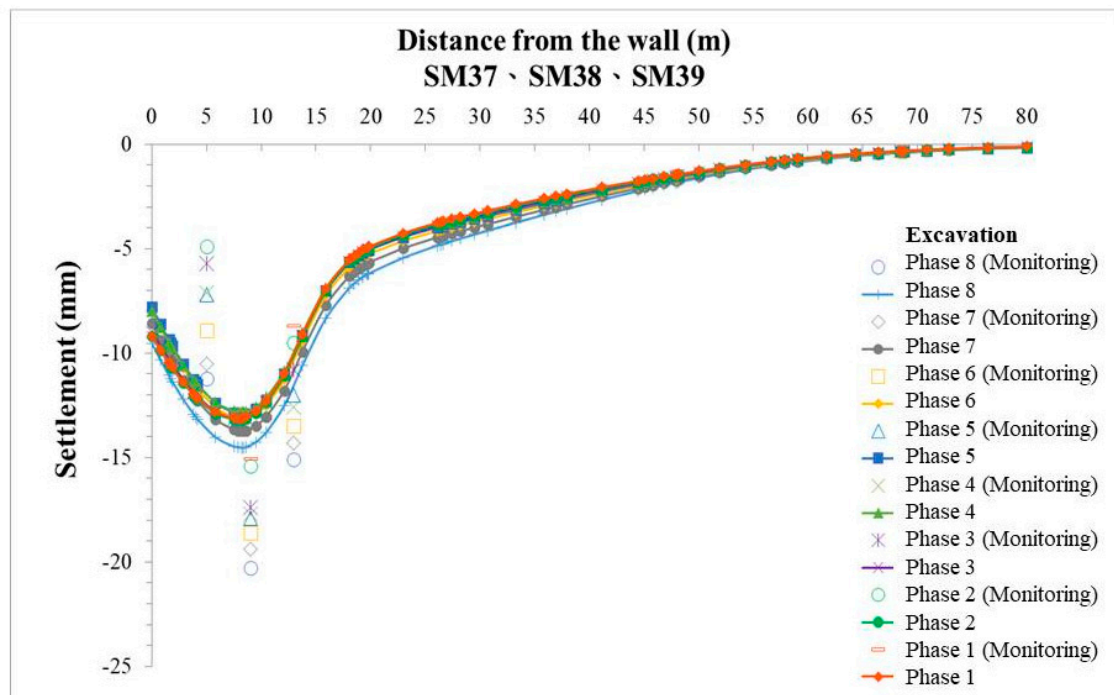

**Figure S5.** Comparison of Ground Subsidence Analysis and Monitoring Results for Each Excavation Phase on the Northwest Side

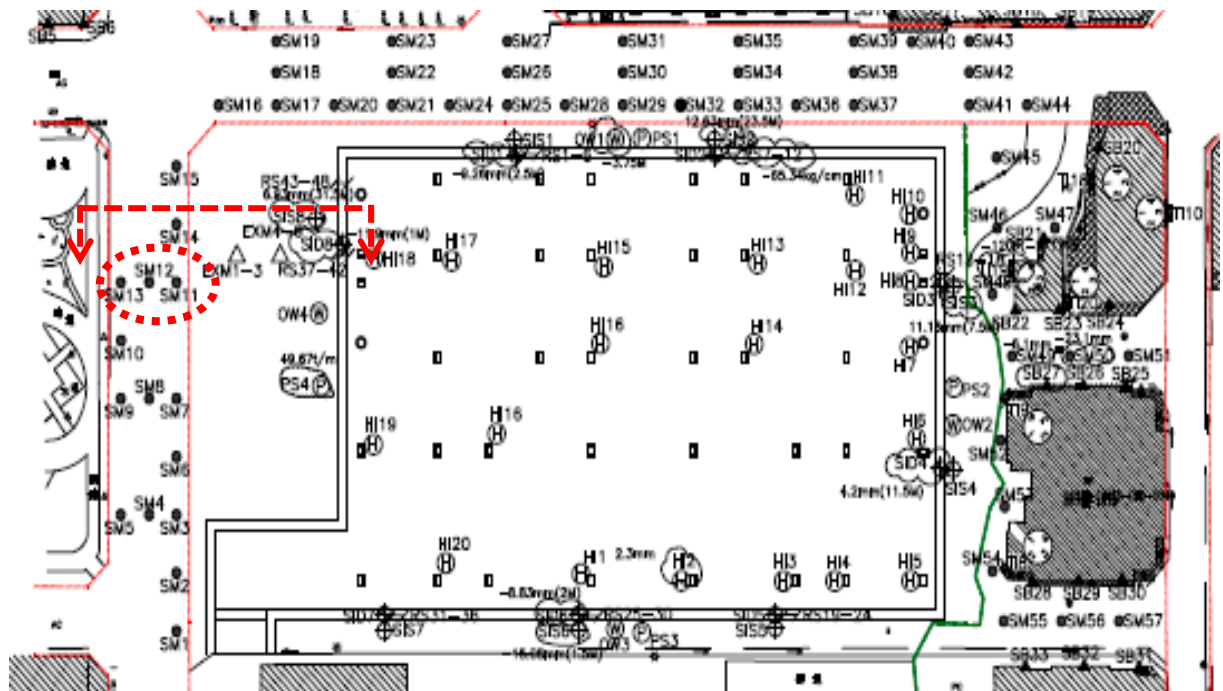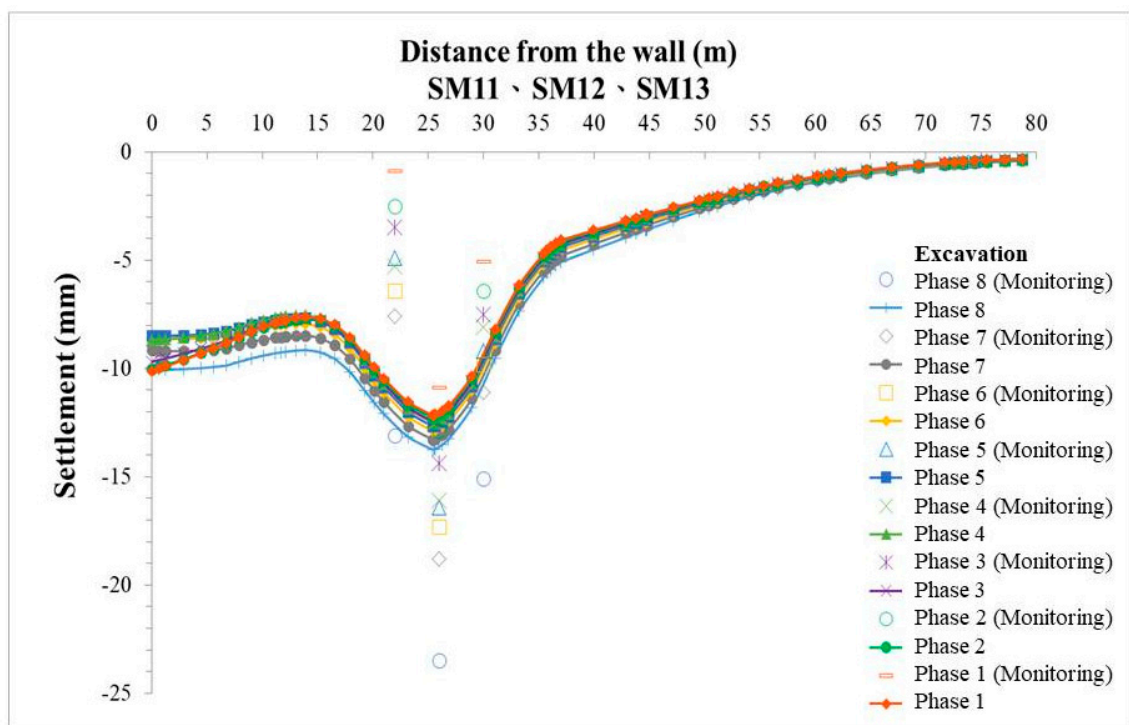

**Figure S6.** Comparison of Ground Subsidence Analysis and Monitoring Results for Each Excavation Phase on the Southwest Side

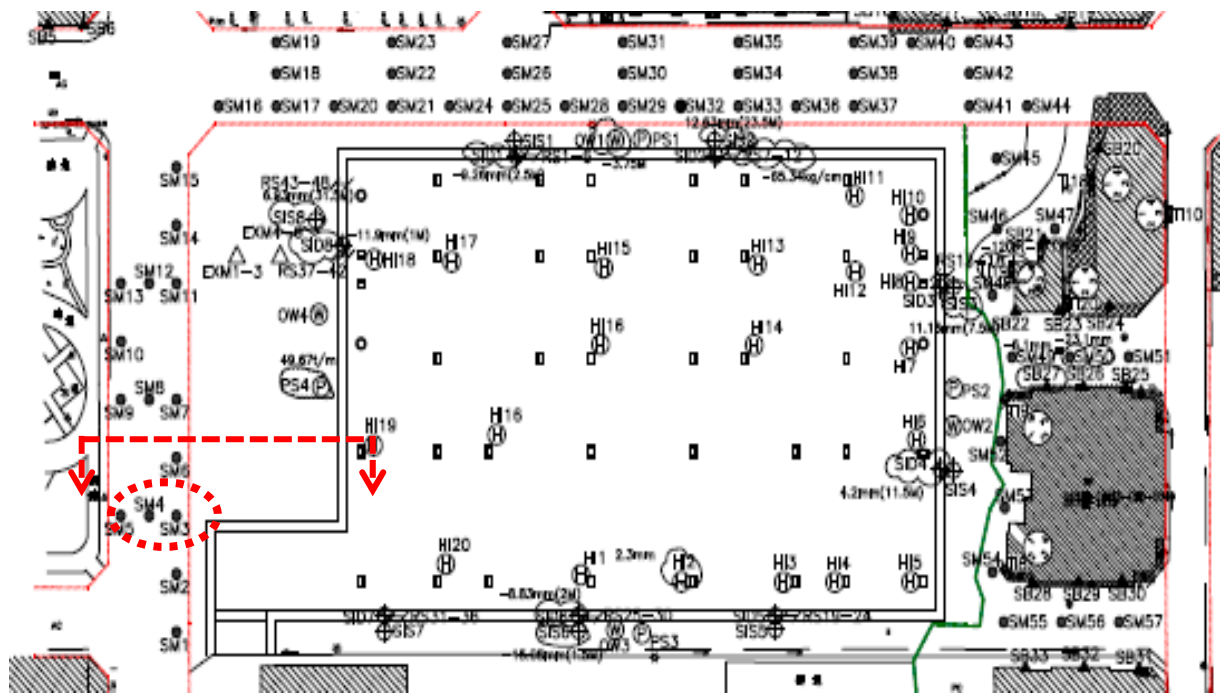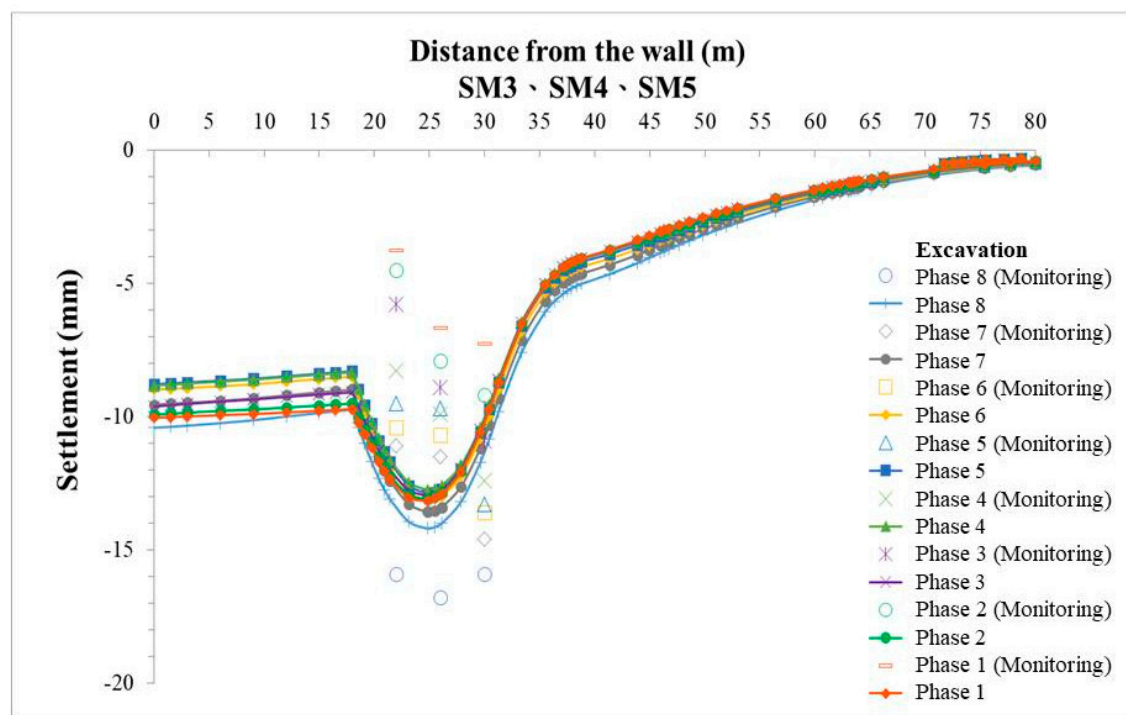

**Figure S7.** Comparison of Ground Subsidence Analysis and Monitoring Results for Each Excavation Phase on the Northwest Side

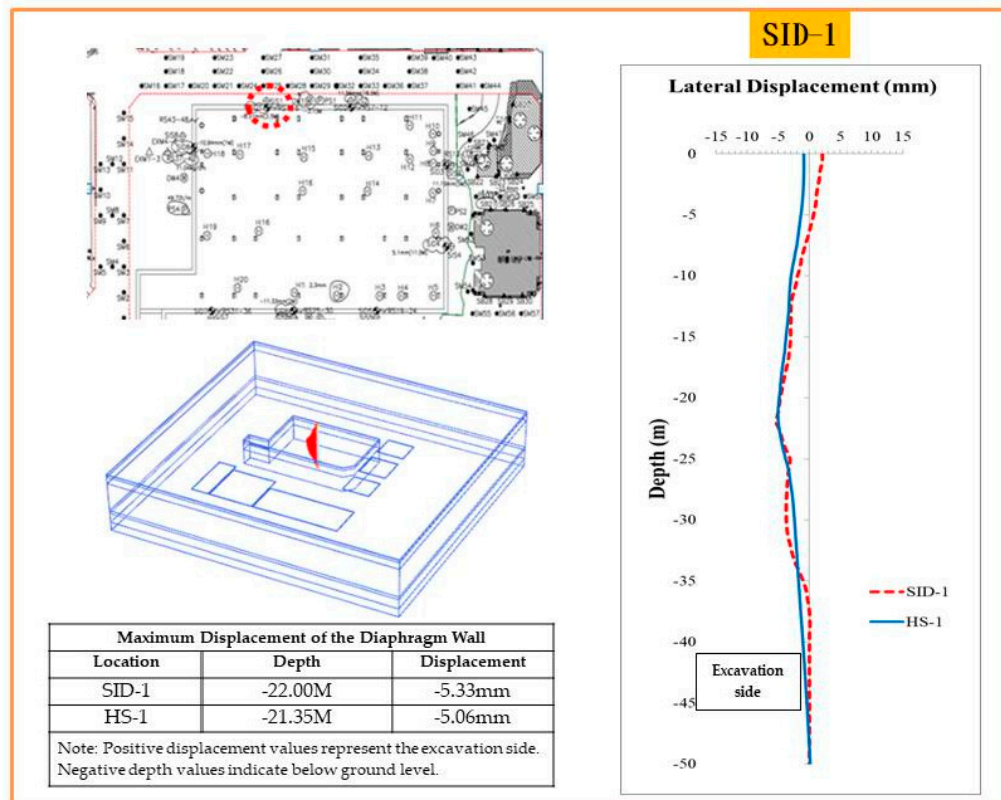

**Figure S8.** Comparison of Numerical Analysis Results with Monitoring Values from Monitoring Point SID-1

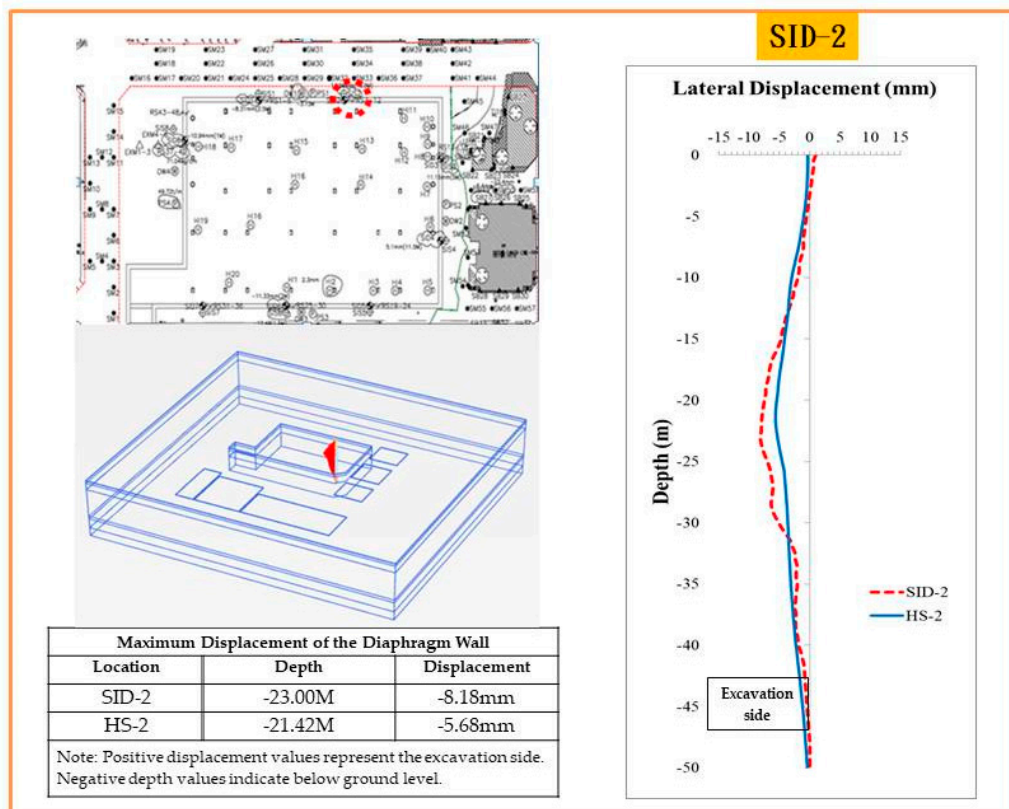

**FigureS9.** Comparison of Numerical Analysis Results with Monitoring Values from Monitoring Point SID-2.

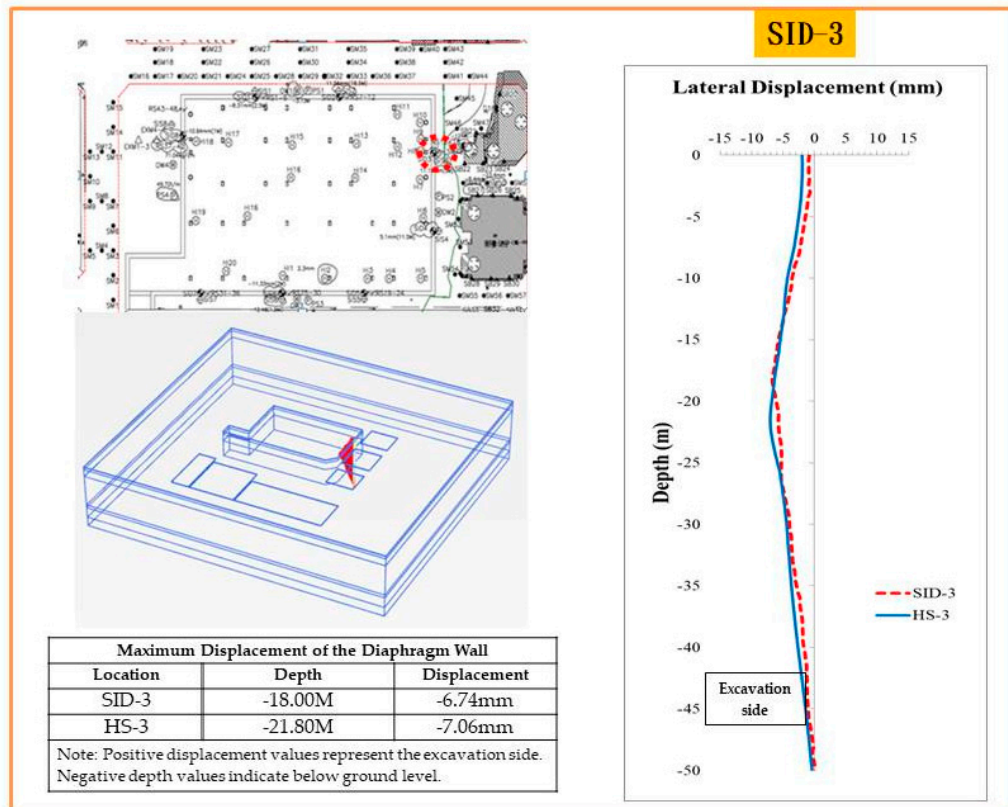

**FigureS10.** Comparison of Numerical Analysis Results with Monitoring Values from Monitoring Point SID-3

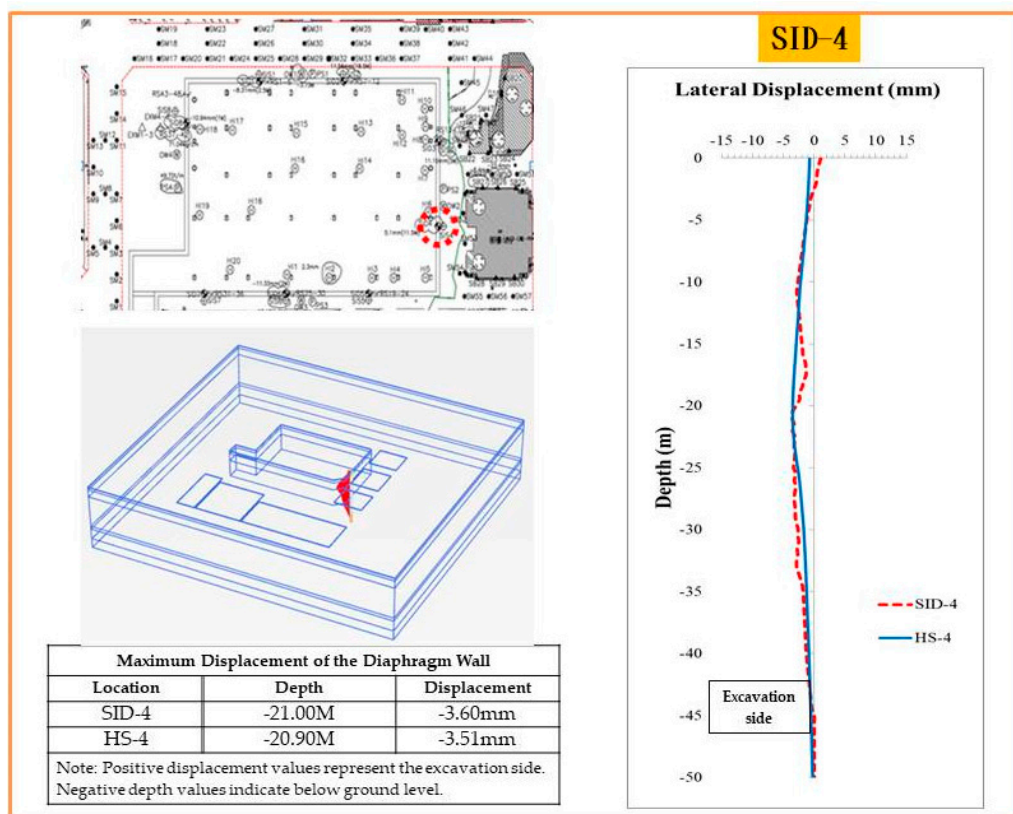

**FigureS11.** Comparison of Numerical Analysis Results with Monitoring Values from Monitoring Point SID-4

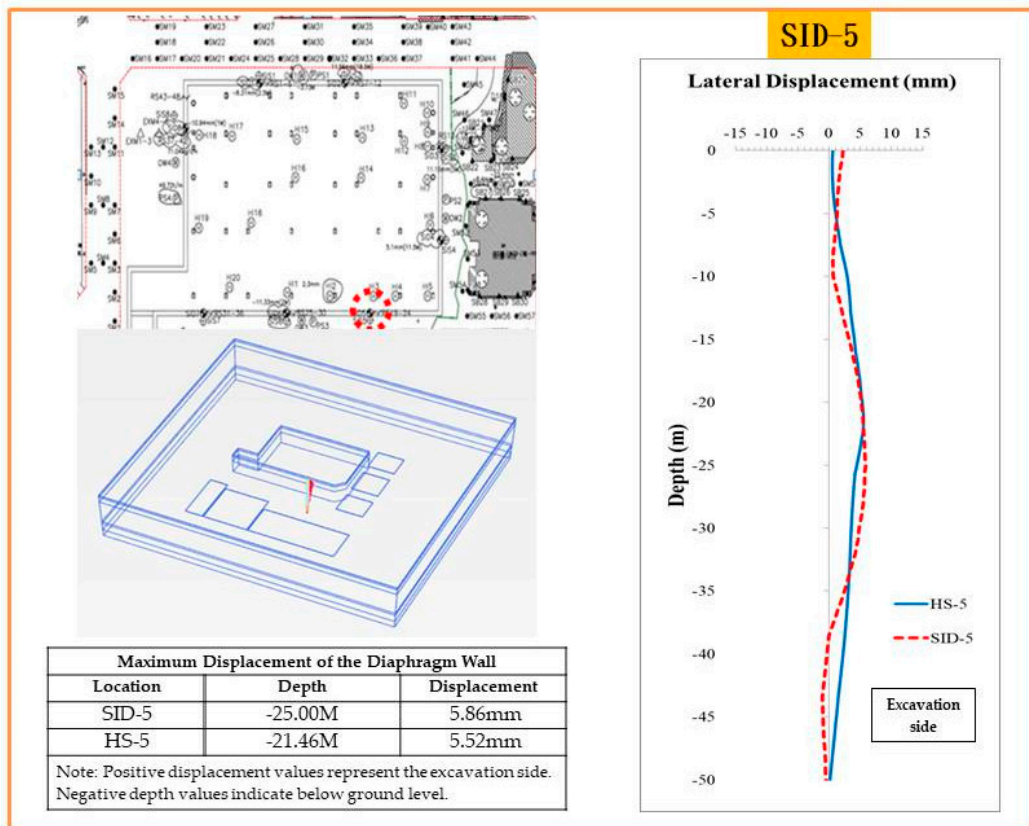

**FigureS12.** Comparison of Numerical Analysis Results with Monitoring Values from Monitoring Point SID-5

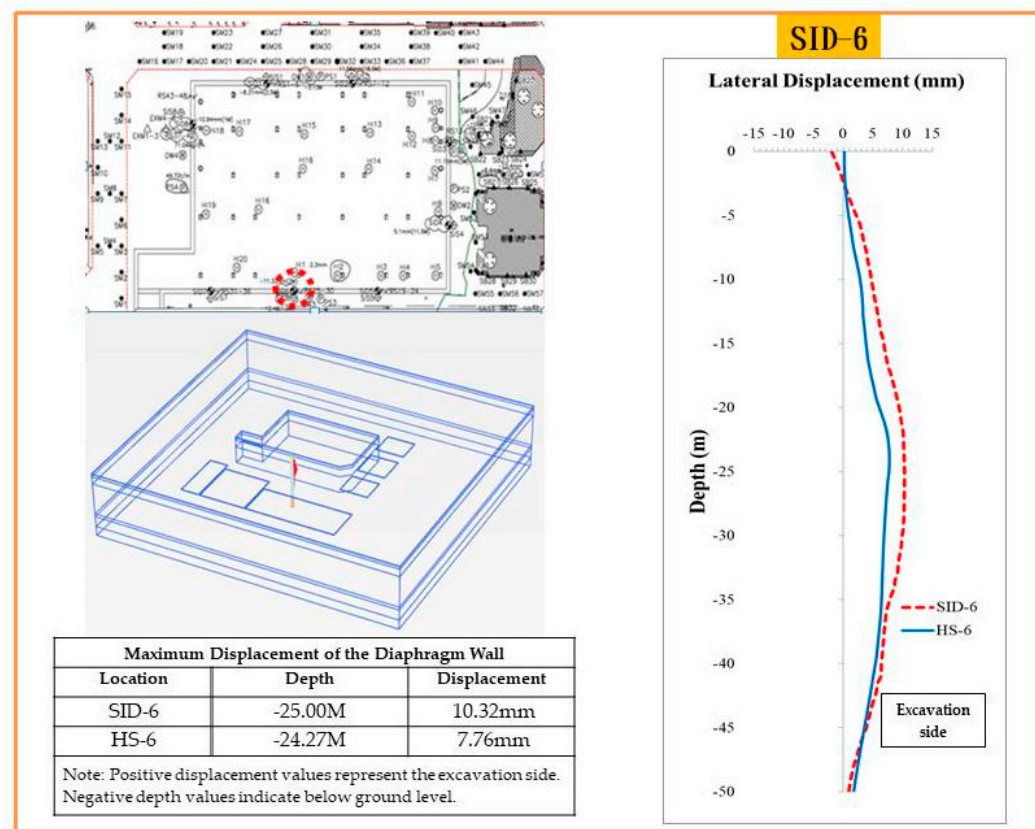

**FigureS13.** Comparison of Numerical Analysis Results with Monitoring Values from Monitoring Point SID-6

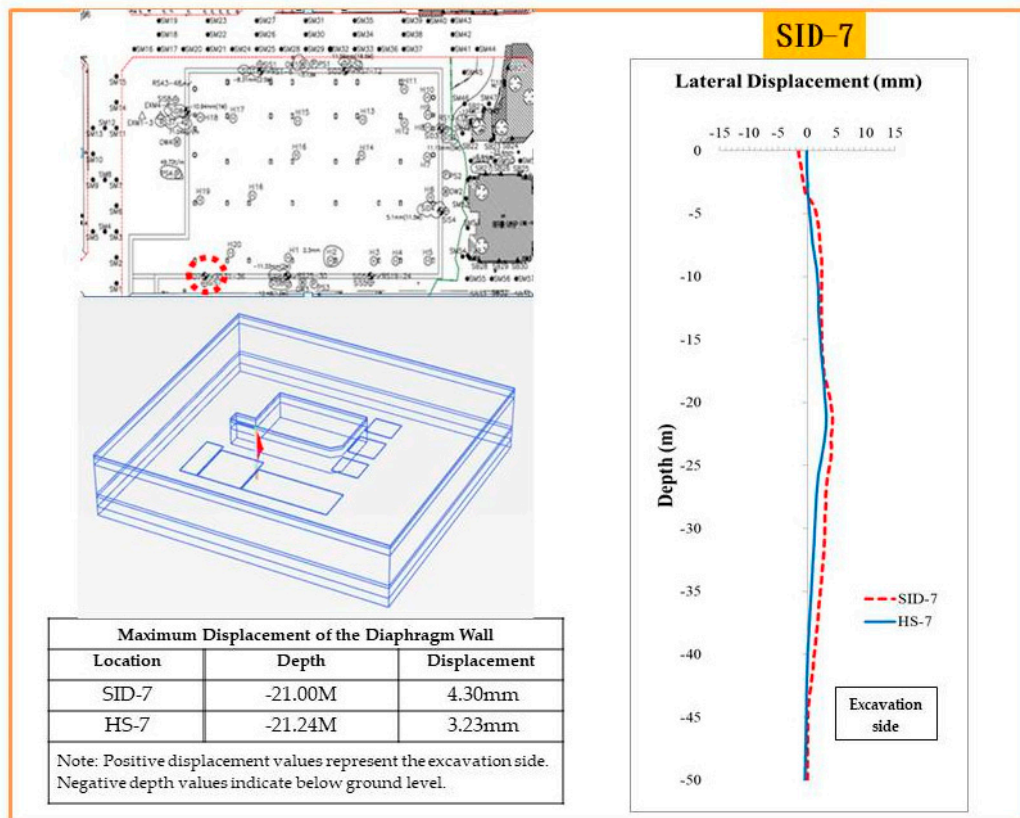

**FigureS14.** Comparison of Numerical Analysis Results with Monitoring Values from Monitoring Point SID-7

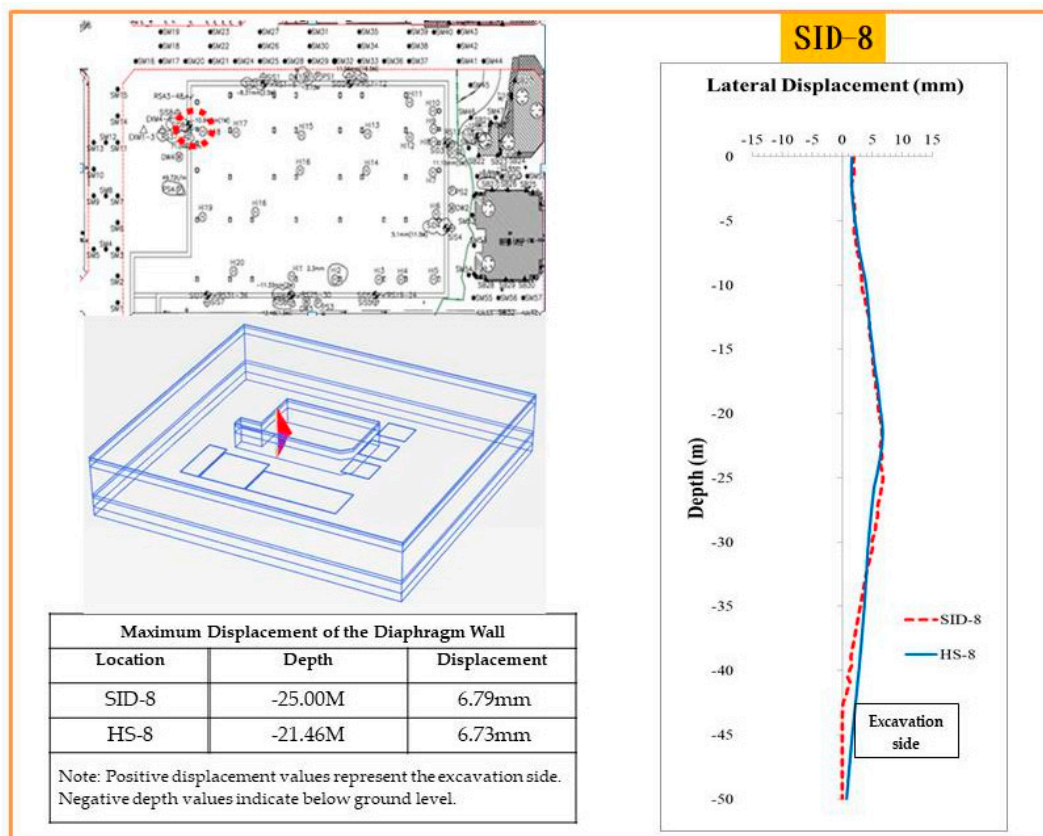

**FigureS15.** Comparison of Numerical Analysis Results with Monitoring Values from Monitoring Point SID-8

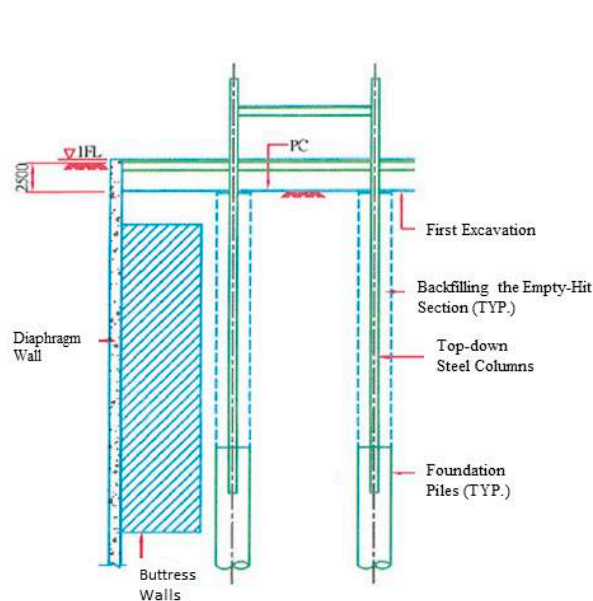

Explanation:

- ① Excavate the soil to GL-2.5M.
- ② Pour PC at a thickness of 10cm and construct the 1F steel beam structure.
- ③ After layout, make the template and complete the rebar installation, pour the 1F concrete.

#### Top-down Construction Steps 1- Diagram

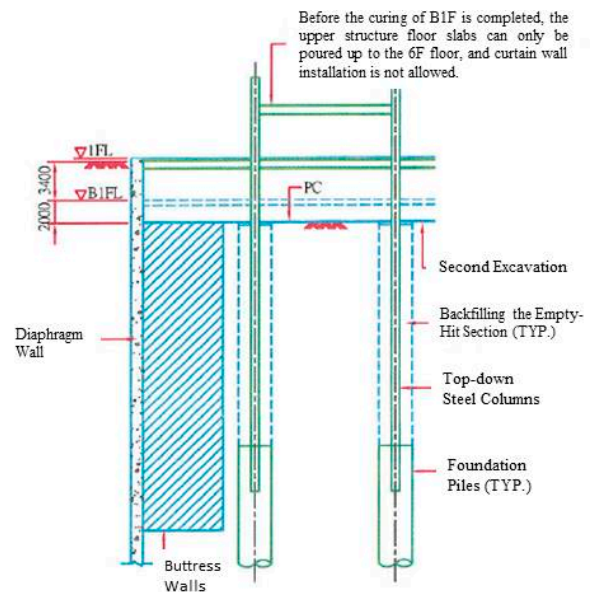

Explanation:

- ① Once the curing time has been reached, preparation for the second excavation begins.
- ② The second excavation goes down to approximately 2.0M below B1F while simultaneously removing the support walls.
- ③ Pour P.C. with a thickness of 10cm.
- ④ After the layout is made and the rebar is installed, pour the B1F concrete.

#### Top-down Construction Steps 2- Diagram

FigureS16. Schematic Diagram of the Timing Steps for Removing Buttress Walls (Step 1 to Step 2)

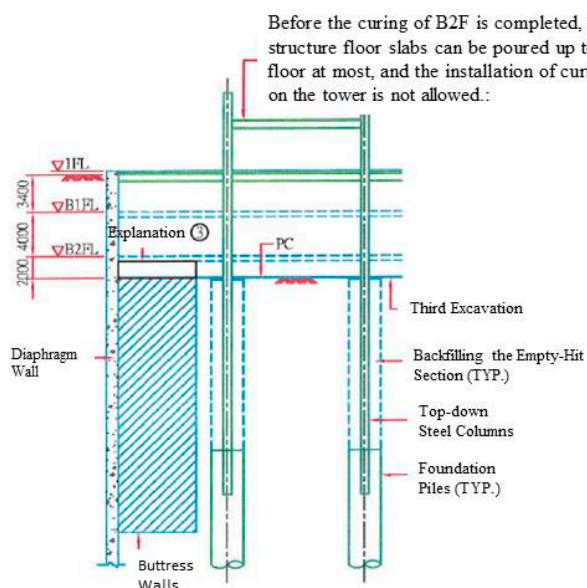

Explanation:

- ① Preparation for the third excavation begins immediately after the curing time is reached.
- ② The third excavation goes down to approximately 2.0M below B2F.
- ③ The buttress on the south toilet side (facing the rapid transit side) is removed down to the B2F slab base, and its rebar is integrated with the B2F floor by pouring them together (refer to the detailed diagram). The remaining buttresses are removed down to the excavation surface.
- ④ P.C. of 10cm thickness is poured.
- ⑤ After the layout is made, templates are created, and upon completion of the rebar installation, the B2F concrete is poured.

#### Top-down Construction Steps 3- Diagram

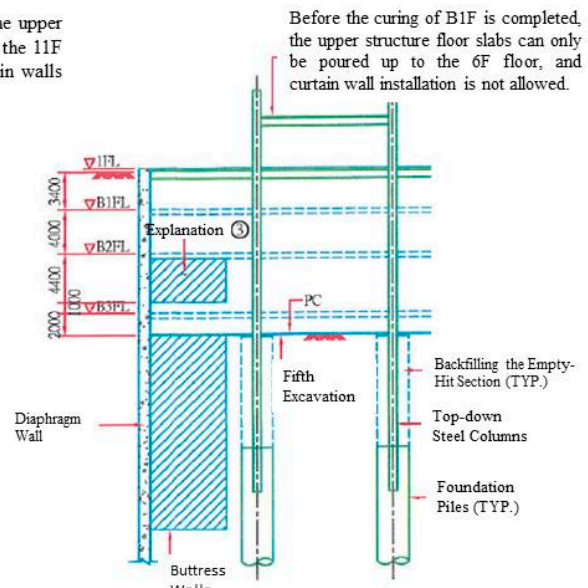

Explanation:

- ① Upon reaching the curing time, preparation for the fourth excavation commences.
- ② The fourth excavation extends to approximately 2.0M below B3F.
- ③ On the south side (adjacent to the rapid transit), the buttress is retained from B2FL to 1M above B3FL, while the rest is removed down to the excavation surface.
- ④ P.C. with a thickness of 10cm is poured.
- ⑤ After the layout, templates are crafted and, upon the completion of the rebar installation, the B2F concrete is poured.

#### Top-down Construction Steps 4- Diagram

FigureS17. Schematic Diagram of the Timing Steps for Removing Buttress Walls (Step 3 to Step 4)

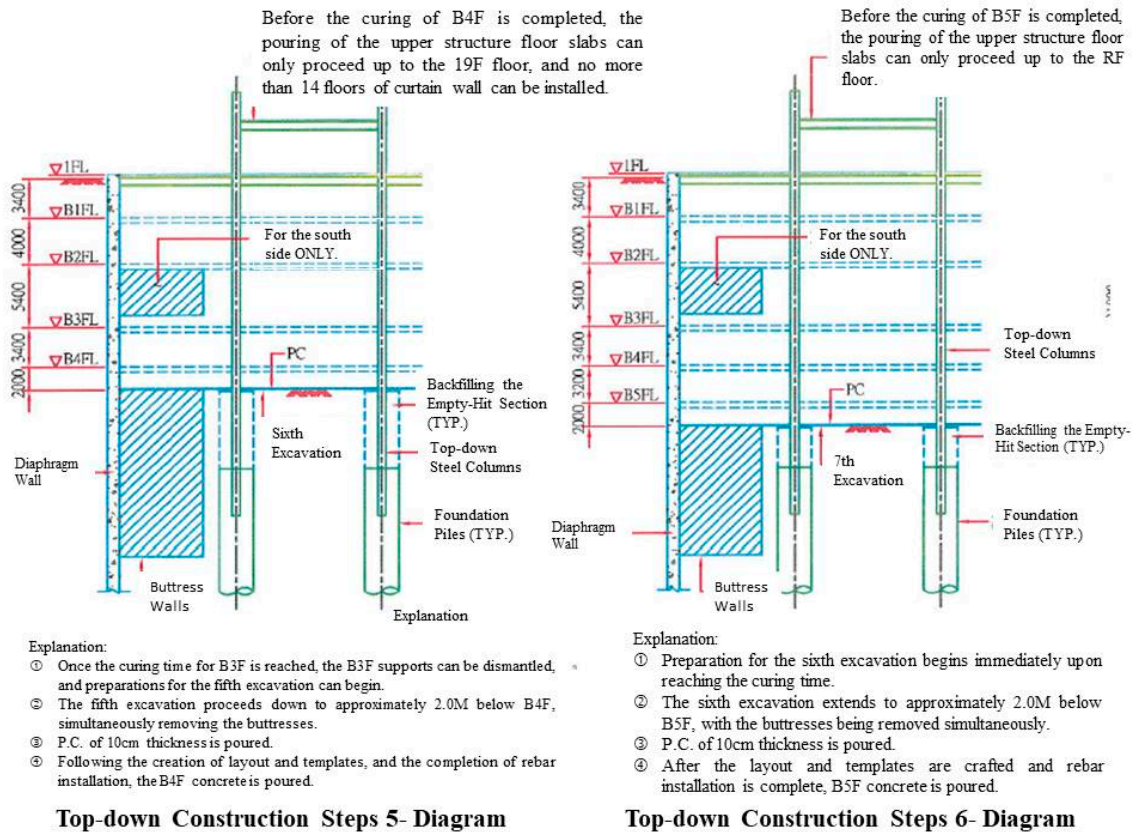

FigureS18. Schematic Diagram of the Timing Steps for Removing Buttress Walls (Step 5 to Step 6)

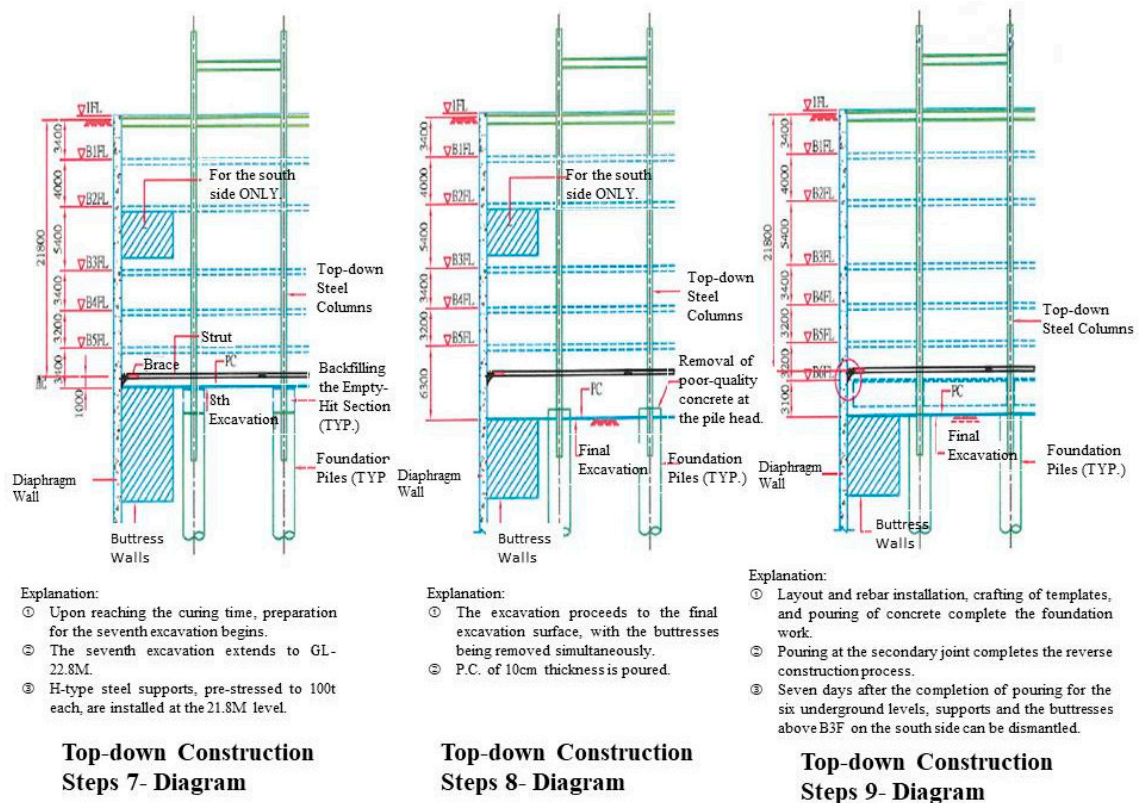

FigureS19. Schematic Diagram of the Timing Steps for Removing Buttress Walls (Step 7 to Step 9)

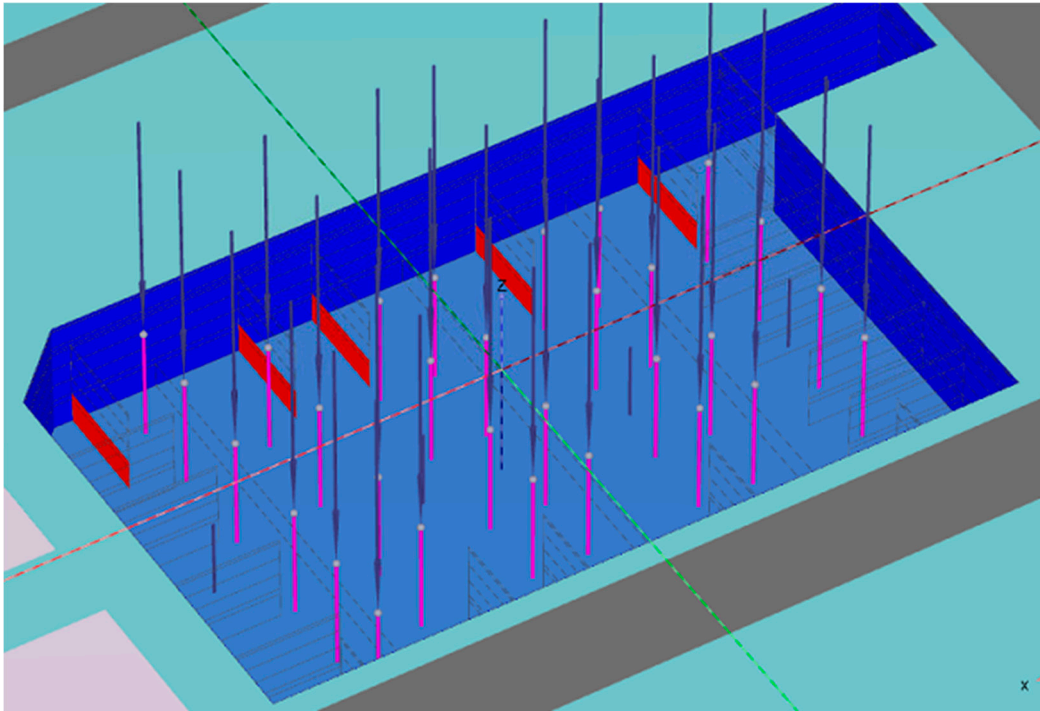

**Figure S20.** Plaxis 3D Simulation Diagram for **Buttress** Wall Removal Timing

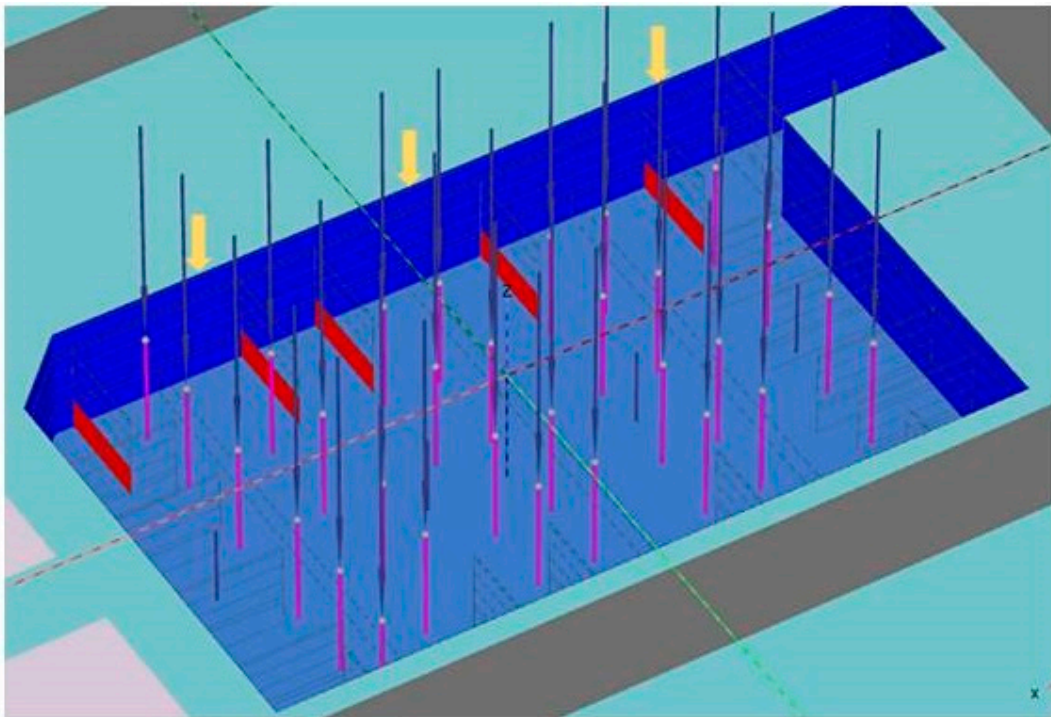

**Figure S21.** Plaxis 3D Analysis Location Diagram
